# Supplementary material for: Expression Analysis of Nitrogen Metabolism-Related Genes Reveals Differences in Adaptation to Low-Nitrogen Stress between Two Different Barley Cultivars at Seedling Stage
Source: Hindawi journal article supplement (doi:10.1155/2018/8152860), 2018-06-20
Supplement: f1 [file 8152860.f1.pdf]

## **Supplementary materials**

Table S1. Two-way ANOVA of Ct' value of each gene expression at different time points after low-nitrogen stress in shoots of the two barley cultivars

Table S2. Two-way ANOVA of Ct' value of each gene expression at different time points after low-nitrogen stress in roots of the two barley cultivars

Table S3. Two-way ANOVA of Ct' value of each gene expression at different time points after low-nitrogen stress between shoots and roots of BI-04

Table S4. Two-way ANOVA of Ct' value of each gene expression at different time points after low-nitrogen stress between shoots and roots of BI-45

Table S5. Ct' value of gene expression at different time points after low-nitrogen stress and the significant difference analysis in shoots and roots of the two barley cultivars

Table S6. Ct' value of gene expression at different time points and significant difference analysis between shoots and roots of the two barley cultivars

Table S1. Two-way ANOVA of Ct' value of each gene expression at different time points after low-nitrogen stress in shoots of the two barley cultivars

| Source                      | Gene            | SS        | df | MS        | F      | Sig.  |
|-----------------------------|-----------------|-----------|----|-----------|--------|-------|
| Cultivar                    | <i>HvNRT3.1</i> | 0.216     | 1  | 0.216     | 0.379  | 0.551 |
|                             | <i>HvNRT3.3</i> | 0.038     | 1  | 0.038     | 0.040  | 0.846 |
|                             | <i>HvNIA2</i>   | 0.678     | 1  | 0.678     | 1.217  | 0.294 |
|                             | <i>HvNiR1</i>   | 1.144     | 1  | 1.144     | 1.384  | 0.259 |
|                             | <i>HvGS1_1</i>  | 1.252E-05 | 1  | 1.252E-05 | 0.000  | 0.992 |
|                             | <i>HvGS2</i>    | 1.786     | 1  | 1.786     | 5.373  | 0.034 |
|                             | <i>HvGLU2</i>   | 0.818     | 1  | 0.818     | 0.459  | 0.508 |
|                             | <i>HvASN1</i>   | 0.330     | 1  | 0.330     | 1.214  | 0.303 |
| Time<br>Point               | <i>HvNRT3.1</i> | 4.884     | 3  | 1.628     | 2.852  | 0.086 |
|                             | <i>HvNRT3.3</i> | 2.543     | 3  | 0.848     | 0.893  | 0.478 |
|                             | <i>HvNIA2</i>   | 2.591     | 3  | 0.864     | 1.549  | 0.257 |
|                             | <i>HvNiR1</i>   | 6.916     | 3  | 2.305     | 2.789  | 0.079 |
|                             | <i>HvGS1_1</i>  | 5.197     | 3  | 1.732     | 16.334 | 0.001 |
|                             | <i>HvGS2</i>    | 1.185     | 3  | 0.395     | 1.188  | 0.346 |
|                             | <i>HvGLU2</i>   | 3.451     | 3  | 1.150     | 0.646  | 0.597 |
|                             | <i>HvASN1</i>   | 7.391     | 3  | 2.464     | 9.070  | 0.006 |
| Cultivar<br>× Time<br>Point | <i>HvNRT3.1</i> | 1.499     | 3  | 0.500     | 0.875  | 0.483 |
|                             | <i>HvNRT3.3</i> | 0.216     | 2  | 0.108     | 0.114  | 0.894 |
|                             | <i>HvNIA2</i>   | 0.849     | 3  | 0.283     | 0.507  | 0.685 |
|                             | <i>HvNiR1</i>   | 1.363     | 3  | 0.454     | 0.549  | 0.657 |
|                             | <i>HvGS1_1</i>  | 1.248     | 3  | 0.416     | 3.922  | 0.048 |
|                             | <i>HvGS2</i>    | 2.286     | 3  | 0.762     | 2.293  | 0.117 |
|                             | <i>HvGLU2</i>   | 13.271    | 3  | 4.424     | 2.483  | 0.098 |
|                             | <i>HvASN1</i>   | 0.012     | 1  | 0.012     | 0.043  | 0.841 |
| Total                       | <i>HvNRT3.1</i> | 338.511   | 19 |           |        |       |
|                             | <i>HvNRT3.3</i> | 285.484   | 17 |           |        |       |
|                             | <i>HvNIA2</i>   | 274.413   | 19 |           |        |       |
|                             | <i>HvNiR1</i>   | 45.332    | 22 |           |        |       |
|                             | <i>HvGS1_1</i>  | 330.869   | 17 |           |        |       |
|                             | <i>HvGS2</i>    | 367.074   | 24 |           |        |       |
|                             | <i>HvGLU2</i>   | 264.552   | 24 |           |        |       |
|                             | <i>HvASN1</i>   | 197.599   | 14 |           |        |       |

Table S2. Two-way ANOVA of Ct' value of each gene expression at different time points after low-nitrogen stress in roots of the two barley cultivars

| Source                | Gene            | SS      | df | MS     | F      | Sig.  |
|-----------------------|-----------------|---------|----|--------|--------|-------|
| Cultivar              | <i>HvNRT2.2</i> | 15.224  | 1  | 15.224 | 35.243 | 0.000 |
|                       | <i>HvNRT2.3</i> | 0.107   | 1  | 0.107  | 0.258  | 0.619 |
|                       | <i>HvNRT3.1</i> | 2.086   | 1  | 2.086  | 13.396 | 0.002 |
|                       | <i>HvNRT3.3</i> | 3.366   | 1  | 3.366  | 26.148 | 0.000 |
|                       | <i>HvNIA2</i>   | 1.152   | 1  | 1.152  | 2.392  | 0.143 |
|                       | <i>HvNiR1</i>   | 4.625   | 1  | 4.625  | 14.021 | 0.002 |
|                       | <i>HvGS1_1</i>  | 2.241   | 1  | 2.241  | 4.824  | 0.045 |
|                       | <i>HvGS2</i>    | 1.480   | 1  | 1.480  | 13.763 | 0.002 |
|                       | <i>HvGLU2</i>   | 6.497   | 1  | 6.497  | 26.644 | 0.000 |
|                       | <i>HvASN1</i>   | 4.484   | 1  | 4.484  | 3.096  | 0.109 |
| Time Point            | <i>HvNRT2.2</i> | 84.236  | 3  | 28.079 | 65.001 | 0.000 |
|                       | <i>HvNRT2.3</i> | 67.433  | 3  | 22.478 | 54.418 | 0.000 |
|                       | <i>HvNRT3.1</i> | 6.630   | 3  | 2.210  | 14.190 | 0.000 |
|                       | <i>HvNRT3.3</i> | 4.575   | 3  | 1.525  | 11.847 | 0.000 |
|                       | <i>HvNIA2</i>   | 36.998  | 3  | 12.333 | 25.603 | 0.000 |
|                       | <i>HvNiR1</i>   | 14.831  | 3  | 4.944  | 14.988 | 0.000 |
|                       | <i>HvGS1_1</i>  | 11.715  | 3  | 3.905  | 8.408  | 0.002 |
|                       | <i>HvGS2</i>    | 23.116  | 3  | 7.705  | 71.633 | 0.000 |
|                       | <i>HvGLU2</i>   | 4.255   | 3  | 1.418  | 5.817  | 0.008 |
|                       | <i>HvASN1</i>   | 5.916   | 3  | 1.972  | 1.362  | 0.310 |
| Cultivar × Time Point | <i>HvNRT2.2</i> | 0.531   | 3  | 0.177  | 0.410  | 0.748 |
|                       | <i>HvNRT2.3</i> | 2.369   | 3  | 0.790  | 1.912  | 0.174 |
|                       | <i>HvNRT3.1</i> | 1.229   | 3  | 0.410  | 2.629  | 0.086 |
|                       | <i>HvNRT3.3</i> | 2.243   | 3  | 0.748  | 5.808  | 0.007 |
|                       | <i>HvNIA2</i>   | 3.246   | 3  | 1.082  | 2.246  | 0.125 |
|                       | <i>HvNiR1</i>   | 0.282   | 3  | 0.094  | 0.285  | 0.836 |
|                       | <i>HvGS1_1</i>  | 0.641   | 3  | 0.214  | 0.460  | 0.715 |
|                       | <i>HvGS2</i>    | 0.272   | 3  | 0.091  | 0.844  | 0.491 |
|                       | <i>HvGLU2</i>   | 0.421   | 3  | 0.140  | 0.576  | 0.640 |
|                       | <i>HvASN1</i>   | 3.971   | 3  | 1.324  | 0.914  | 0.469 |
| Total                 | <i>HvNRT2.2</i> | 411.789 | 23 |        |        |       |
|                       | <i>HvNRT2.3</i> | 351.726 | 22 |        |        |       |
|                       | <i>HvNRT3.1</i> | 82.016  | 24 |        |        |       |
|                       | <i>HvNRT3.3</i> | 70.878  | 24 |        |        |       |
|                       | <i>HvNIA2</i>   | 466.910 | 23 |        |        |       |
|                       | <i>HvNiR1</i>   | 61.300  | 23 |        |        |       |
|                       | <i>HvGS1_1</i>  | 636.533 | 22 |        |        |       |
|                       | <i>HvGS2</i>    | 68.875  | 23 |        |        |       |
|                       | <i>HvGLU2</i>   | 511.137 | 23 |        |        |       |
|                       | <i>HvASN1</i>   | 656.328 | 18 |        |        |       |

Table S3. Two-way ANOVA of Ct' value of each gene expression at different time points after low-nitrogen stress between shoots and roots of BI-04

| Source              | Gene            | SS      | df | MS      | F        | Sig.  |
|---------------------|-----------------|---------|----|---------|----------|-------|
| Tissue              | <i>HvNRT3.1</i> | 175.118 | 1  | 175.118 | 1034.642 | 0.000 |
|                     | <i>HvNRT3.3</i> | 141.376 | 1  | 141.376 | 291.690  | 0.000 |
|                     | <i>HvNIA2</i>   | 1.734   | 1  | 1.734   | 5.858    | 0.030 |
|                     | <i>HvNiR1</i>   | 35.283  | 1  | 35.283  | 93.812   | 0.000 |
|                     | <i>HvGS1_1</i>  | 1.975   | 1  | 1.975   | 6.151    | 0.029 |
|                     | <i>HvGS2</i>    | 162.114 | 1  | 162.114 | 1759.644 | 0.000 |
|                     | <i>HvGLU2</i>   | 32.016  | 1  | 32.016  | 134.911  | 0.000 |
|                     | <i>HvASN1</i>   | 26.347  | 1  | 26.347  | 30.617   | 0.000 |
| Time Point          | <i>HvNRT3.1</i> | 4.370   | 3  | 1.457   | 8.607    | 0.002 |
|                     | <i>HvNRT3.3</i> | 1.701   | 3  | 0.567   | 1.170    | 0.359 |
|                     | <i>HvNIA2</i>   | 7.689   | 3  | 2.563   | 8.658    | 0.002 |
|                     | <i>HvNiR1</i>   | 13.085  | 3  | 4.362   | 11.597   | 0.000 |
|                     | <i>HvGS1_1</i>  | 6.404   | 3  | 2.135   | 6.648    | 0.007 |
|                     | <i>HvGS2</i>    | 10.938  | 3  | 3.646   | 39.573   | 0.000 |
|                     | <i>HvGLU2</i>   | 6.933   | 3  | 2.311   | 9.738    | 0.001 |
|                     | <i>HvASN1</i>   | 4.284   | 3  | 1.428   | 1.659    | 0.233 |
| Tissue × Time Point | <i>HvNRT3.1</i> | 0.812   | 3  | 0.271   | 1.599    | 0.234 |
|                     | <i>HvNRT3.3</i> | 0.840   | 3  | 0.280   | 0.578    | 0.640 |
|                     | <i>HvNIA2</i>   | 2.812   | 3  | 0.937   | 3.167    | 0.058 |
|                     | <i>HvNiR1</i>   | 0.216   | 3  | 0.072   | 0.191    | 0.901 |
|                     | <i>HvGS1_1</i>  | 0.520   | 3  | 0.173   | 0.540    | 0.664 |
|                     | <i>HvGS2</i>    | 4.588   | 3  | 1.529   | 16.599   | 0.000 |
|                     | <i>HvGLU2</i>   | 1.569   | 3  | 0.523   | 2.204    | 0.127 |
|                     | <i>HvASN1</i>   | 8.815   | 3  | 2.938   | 3.414    | 0.057 |
| Total               | <i>HvNRT3.1</i> | 210.110 | 22 |         |          |       |
|                     | <i>HvNRT3.3</i> | 177.900 | 21 |         |          |       |
|                     | <i>HvNIA2</i>   | 405.440 | 22 |         |          |       |
|                     | <i>HvNiR1</i>   | 61.898  | 23 |         |          |       |
|                     | <i>HvGS1_1</i>  | 461.833 | 20 |         |          |       |
|                     | <i>HvGS2</i>    | 202.271 | 24 |         |          |       |
|                     | <i>HvGLU2</i>   | 425.956 | 24 |         |          |       |
|                     | <i>HvASN1</i>   | 541.360 | 19 |         |          |       |

Table S4. Two-way ANOVA of Ct' value of each gene expression at different time points after low-nitrogen stress between shoots and roots of BI-45

| Source              | Gene            | SS      | df | MS      | F       | Sig.  |
|---------------------|-----------------|---------|----|---------|---------|-------|
| Tissue              | <i>HvNRT3.1</i> | 188.150 | 1  | 188.150 | 382.090 | 0.000 |
|                     | <i>HvNRT3.3</i> | 162.322 | 1  | 162.322 | 402.346 | 0.000 |
|                     | <i>HvNIA2</i>   | 1.218   | 1  | 1.218   | 1.586   | 0.232 |
|                     | <i>HvNiR1</i>   | 22.584  | 1  | 22.584  | 29.060  | 0.000 |
|                     | <i>HvGS1_1</i>  | 7.624   | 1  | 7.624   | 23.275  | 0.001 |
|                     | <i>HvGS2</i>    | 154.557 | 1  | 154.557 | 424.735 | 0.000 |
|                     | <i>HvGLU2</i>   | 4.255   | 1  | 4.255   | 2.250   | 0.154 |
|                     | <i>HvASN1</i>   | 8.528   | 1  | 8.528   | 8.303   | 0.024 |
| Time Point          | <i>HvNRT3.1</i> | 8.222   | 3  | 2.741   | 5.566   | 0.011 |
|                     | <i>HvNRT3.3</i> | 7.107   | 3  | 2.369   | 5.872   | 0.009 |
|                     | <i>HvNIA2</i>   | 9.236   | 3  | 3.079   | 4.010   | 0.034 |
|                     | <i>HvNiR1</i>   | 9.035   | 3  | 3.012   | 3.875   | 0.033 |
|                     | <i>HvGS1_1</i>  | 10.090  | 3  | 3.363   | 10.268  | 0.002 |
|                     | <i>HvGS2</i>    | 6.822   | 3  | 2.274   | 6.249   | 0.006 |
|                     | <i>HvGLU2</i>   | 2.742   | 3  | 0.914   | 0.483   | 0.699 |
|                     | <i>HvASN1</i>   | 3.819   | 3  | 1.273   | 1.239   | 0.365 |
| Tissue × Time Point | <i>HvNRT3.1</i> | 0.327   | 3  | 0.109   | 0.221   | 0.880 |
|                     | <i>HvNRT3.3</i> | 0.045   | 2  | 0.023   | 0.056   | 0.946 |
|                     | <i>HvNIA2</i>   | 17.133  | 3  | 5.711   | 7.438   | 0.004 |
|                     | <i>HvNiR1</i>   | 1.668   | 3  | 0.556   | 0.715   | 0.559 |
|                     | <i>HvGS1_1</i>  | 0.729   | 3  | 0.243   | 0.742   | 0.549 |
|                     | <i>HvGS2</i>    | 4.722   | 3  | 1.574   | 4.325   | 0.022 |
|                     | <i>HvGLU2</i>   | 9.881   | 3  | 3.294   | 1.742   | 0.201 |
|                     | <i>HvASN1</i>   | 0.062   | 1  | 0.062   | 0.060   | 0.813 |
| Total               | <i>HvNRT3.1</i> | 210.417 | 21 |         |         |       |
|                     | <i>HvNRT3.3</i> | 178.461 | 20 |         |         |       |
|                     | <i>HvNIA2</i>   | 335.883 | 20 |         |         |       |
|                     | <i>HvNiR1</i>   | 44.733  | 22 |         |         |       |
|                     | <i>HvGS1_1</i>  | 505.568 | 19 |         |         |       |
|                     | <i>HvGS2</i>    | 233.678 | 23 |         |         |       |
|                     | <i>HvGLU2</i>   | 349.733 | 23 |         |         |       |
|                     | <i>HvASN1</i>   | 312.567 | 13 |         |         |       |

Table S5. Ct' value of gene expression at different time points after low-nitrogen stress and the significant difference analysis in shoots and roots of the two barley cultivars

| Cultivar | tissue | gene            | Time     |           |          |           |
|----------|--------|-----------------|----------|-----------|----------|-----------|
|          |        |                 | 0h       | 1h        | 24h      | 48h       |
| BI-04    | shoots | <i>HvNRT3.1</i> | 2.5242   | 3.2238    | 4.0189   | 3.7157    |
|          |        | <i>HvNRT3.3</i> | 2.5150   | 2.7862    | 1.8412   | 4.2263    |
|          |        | <i>HvNIA2</i>   | 3.9454   | 4.4565    | 3.6706   | 3.4719    |
|          |        | <i>HvNiR1</i>   | 0.3571a  | 0.3204ab  | -1.5360c | -1.4461bc |
|          |        | <i>HvGS1_1</i>  | 5.1318a  | 4.2449b   | 3.8322b  | 4.2746b   |
|          |        | <i>HvGS2</i>    | -2.8683a | -3.8355b  | -3.9644b | -3.6570b  |
|          |        | <i>HvGLU2</i>   | 3.9071a  | 2.3470b   | 2.3832b  | 2.6935b   |
|          |        | <i>HvASN1</i>   | 3.5239ab | 2.9935a   | 4.8000bc | 5.0842c   |
|          | roots  | <i>HvNRT2.2</i> | 6.7723a  | 5.9227a   | 3.2888b  | 1.8972b   |
|          |        | <i>HvNRT2.3</i> | 4.7880a  | 5.7318b   | 1.8953c  | 2.2047c   |
|          |        | <i>HvNRT3.1</i> | -1.0198a | -1.0565a  | -1.7425b | -1.8126b  |
|          |        | <i>HvNRT3.3</i> | -1.0148  | -0.9863   | -1.3063  | -1.4467   |
|          |        | <i>HvNIA2</i>   | 5.7547a  | 4.9258a   | 3.5062b  | 3.7656b   |
|          |        | <i>HvNiR1</i>   | 2.7222a  | 2.0690ab  | 1.2638bc | 0.8654c   |
|          |        | <i>HvGS1_1</i>  | 6.2142a  | 4.7159ab  | 4.6027b  | 4.5166b   |
|          |        | <i>HvGS2</i>    | 2.9248a  | 2.2228b   | 1.1785c  | 0.1406d   |
|          |        | <i>HvGLU2</i>   | 5.5853a  | 4.4208b   | 4.7993ab | 5.7652a   |
|          |        | <i>HvASN1</i>   | 5.2107   | 7.0003    | 6.6396   | 7.1538    |
| BI-45    | shoots | <i>HvNRT3.1</i> | 2.9189   | 4.3348    | 3.6058   | 3.5165    |
|          |        | <i>HvNRT3.3</i> | ND       | 4.3781    | 3.5497   | 3.9017    |
|          |        | <i>HvNIA2</i>   | 4.0654   | 4.1348    | 3.5576   | 3.5701    |
|          |        | <i>HvNiR1</i>   | -0.8519  | -0.8786   | -1.3155  | -1.8846   |
|          |        | <i>HvGS1_1</i>  | 5.4732a  | 4.2707b   | 4.3229ab | 3.4097b   |
|          |        | <i>HvGS2</i>    | -4.1740  | -3.9364   | -3.7611  | -4.6361   |
|          |        | <i>HvGLU2</i>   | 2.3878   | 4.1788    | 4.2006   | 2.0410    |
|          |        | <i>HvASN1</i>   | 3.0834   | 2.6925    | ND       | ND        |
|          | roots  | <i>HvNRT2.2</i> | 5.0655a  | 4.2191a   | 1.2984b  | 0.7303b   |
|          |        | <i>HvNRT2.3</i> | 6.1106a  | 5.3524a   | 1.5773b  | 2.1455b   |
|          |        | <i>HvNRT3.1</i> | -0.9174a | -1.8583ab | -2.8721c | -2.3423bc |
|          |        | <i>HvNRT3.3</i> | -0.8259a | -1.8644b  | -2.8286c | -2.2312bc |
|          |        | <i>HvNIA2</i>   | 6.5658a  | 4.2340b   | 2.5597b  | 2.7860b   |
|          |        | <i>HvNiR1</i>   | 2.1342a  | 1.2808ab  | 0.1203bc | -0.2347c  |
|          |        | <i>HvGS1_1</i>  | 6.9357a  | 5.9080ab  | 4.9494b  | 4.8490b   |
|          |        | <i>HvGS2</i>    | 2.3697a  | 1.5854a   | 0.4742b  | -0.0106b  |
|          |        | <i>HvGLU2</i>   | 4.5295   | 3.7097    | 3.7679   | 4.2733    |
|          |        | <i>HvASN1</i>   | 5.2287   | 4.5014    | 6.1026   | 6.1170    |

Different letters represent significant differences of the related gene expression among different time points at 0.05 level in shoots and root respectively of BI-04 and Bi-45. ND indicates that expression was not detectable.

Table S6. Ct' value of gene expression at different time points and significant difference analysis between shoots and roots of the two barley cultivars

| Cultivar | Gene            | Tissue | Time     |          |          |          |
|----------|-----------------|--------|----------|----------|----------|----------|
|          |                 |        | 0h       | 1h       | 24h      | 48h      |
| BI-04    | <i>HvNRT3.1</i> | shoots | 2.5242a  | 3.2238a  | 4.0189a  | 3.7157a  |
|          |                 | roots  | -1.0198b | -1.0565b | -1.7425b | -1.8126b |
|          | <i>HvNRT3.3</i> | shoots | 2.5150a  | 2.7862a  | 1.8412a  | 4.2263a  |
|          |                 | roots  | -1.0148b | -0.9863b | -1.3063b | -1.4467b |
|          | <i>HvNIA2</i>   | shoots | 3.9454   | 4.4565   | 3.6706   | 3.4719   |
|          |                 | roots  | 5.7547   | 4.9258   | 3.5062   | 3.7656   |
|          | <i>HvNiR1</i>   | shoots | 0.3571a  | 0.3204a  | -1.5360a | -1.4461a |
|          |                 | roots  | 2.7222b  | 2.0690b  | 1.2638b  | 0.8654b  |
|          | <i>HvGS1_1</i>  | shoots | 5.1318   | 4.2449   | 3.8322   | 4.2746   |
|          |                 | roots  | 6.2142   | 4.7159   | 4.6027   | 4.5166   |
|          | <i>HvGS2</i>    | shoots | -2.8683a | -3.8355a | -3.9644a | -3.6570a |
|          |                 | roots  | 2.9248b  | 2.2228b  | 1.1785b  | 0.1406b  |
|          | <i>HvGLU2</i>   | shoots | 3.9071a  | 2.3470a  | 2.3832a  | 2.6935a  |
|          |                 | roots  | 5.5853b  | 4.4208b  | 4.7993b  | 5.7652b  |
|          | <i>HvASN1</i>   | shoots | 3.5239   | 2.9935a  | 4.8000   | 5.0842   |
|          |                 | roots  | 5.2107   | 7.0003b  | 6.6396   | 7.1538   |
| BI-45    | <i>HvNRT3.1</i> | shoots | 2.9189a  | 4.3348a  | 3.6058a  | 3.5165a  |
|          |                 | roots  | -0.9174b | -1.8583b | -2.8721b | -2.3423b |
|          | <i>HvNRT3.3</i> | shoots | ND       | 4.3781a  | 3.5497a  | 3.9017a  |
|          |                 | roots  | -0.8259  | -1.8644b | -2.8286b | -2.2312b |
|          | <i>HvNIA2</i>   | shoots | 4.0654a  | 4.1348   | 3.5576   | 3.5701   |
|          |                 | roots  | 6.5658b  | 4.2340   | 2.5597   | 2.7860   |
|          | <i>HvNiR1</i>   | shoots | -0.8519a | -0.8786  | -1.3155  | -1.8846a |
|          |                 | roots  | 2.1342b  | 1.2808   | 0.1203   | -0.2347b |
|          | <i>HvGS1_1</i>  | shoots | 5.4732a  | 4.2707   | 4.3229   | 3.4097   |
|          |                 | roots  | 6.9357b  | 5.9080   | 4.9494   | 4.8490   |
|          | <i>HvGS2</i>    | shoots | -4.1740a | -3.9364a | -3.7611a | -4.6361a |
|          |                 | roots  | 2.3697b  | 1.5854b  | 0.4742b  | -0.0106b |
|          | <i>HvGLU2</i>   | shoots | 2.3878a  | 4.1788   | 4.2006   | 2.0410a  |
|          |                 | roots  | 4.5295b  | 3.7097   | 3.7679   | 4.2733b  |
|          | <i>HvASN1</i>   | shoots | 3.0834   | 2.6925   | ND       | ND       |
|          |                 | roots  | 5.2287   | 4.5014   | 6.1026   | 6.1170   |

Different letters represent significant differences of the related gene expression between shoots and roots at 0.05 level in BI-04 and BI-45 respectively. ND indicates that the expression was not detectable.
